# Supplementary material for: Membrane vesicle-mediated release of bacterial RNA
Source: PubMed Central journal article supplement (PMC4612299; doi:10.1038/srep15329), 2015-10-20
Supplement: srep15329-s1.pdf [file srep15329-s1.pdf]

**Supplementary Information:**

**Membrane vesicle-mediated release of bacterial RNA**

Annika E. Sjöström<sup>1,2</sup>, Linda Sandblad<sup>1,2</sup>, Bernt Eric Uhlin<sup>1,2</sup>, Sun Nyunt Wai<sup>1,2</sup> \*

<sup>1</sup>Department of Molecular Biology, Umeå University, S-90187 Umeå, Sweden

<sup>2</sup>The Laboratory for Molecular Infection Medicine Sweden (MIMS), Umeå University, S-91807, Sweden

\* Corresponding author: Tel: +46-90-7856704,

E-mail: [sun.nyunt.wai@molbiol.umu.se](mailto:sun.nyunt.wai@molbiol.umu.se)

## **Legends to Supplementary figures**

### **Supplementary Data Fig. S1.**

A) Analyses of RNA extracted from a log-phase ( $OD = 0.7$ ) culture of *Vibrio cholerae* O1 El Tor strain A1552. Left panel: RNA extracted from whole cells (lane 1) and vesicles (lane 2) using the Total RNA Norgen kit. 1.5  $\mu$ g RNA were run on a 12 % polyacrylamide denaturing gel stained in GelRed (light red). Right panel: RNA was transferred to a membrane for Northern blot analysis and probed with a probe for gene *vc2478,5* (lane 3; whole cells and lane 4: vesicles)

B) Western blot analysis of using antibodies recognizing RpoS to check for possible lysis of bacteria. Lane 1: whole cell extract from overnight culture; lane 2: supernatant from overnight culture after filtration through 0.22  $\mu$ m steripup filters; lane 3: supernatant from overnight culture after ultracentrifugation; lane 4: vesicles from overnight culture; lane 5: whole cell extract from a culture at  $OD_{600} = 3$  and lane 6: whole cell extract from A1552 RpoS mutant.

C) Fluorescence microscopy analysis of bacteria after live/dead staining. Staining was performed using the LIVE/DEAD® BacLight™ Bacterial Viability Kit L13152 with bacterial samples from *V. cholerae* O1 El Tor strain A1552 cultures as follows: a) sample from  $OD_{600} = 0.7$  (log-phase); b) sample from  $OD_{600} = 4.6$  (overnight culture); c) sample from  $OD_{600} = 4.6$  (overnight culture) after treatment with isopropanol to obtain a population of only dead bacteria for comparison.

**Supplementary Data Fig. S2.** Density gradient centrifugation purification of vesicles from an overnight culture of the *V. cholerae* O1 El Tor strain A1552. **A.** Left panel: Photo of the

density gradient tube after ultracentrifugation of a vesicle sample. The five visible rings (fractions) are numbered 1 to 5 in increasing density order. Right panel: Western blot analysis of samples from each numbered fraction using antibodies recognizing OmpU (VC 0633, Outer membrane protein U, 37kDa).

**B.** Analyses of RNA extracted from each of the five density gradient fractions in A. RNA extracts obtained using the Total RNA Norgen kit were separated on a 12 % polyacrylamide denaturing gel. The gel was stained and subsequently blotted for transfer to a membrane. Left panel: Gel stained with GelRed. Right panel: Northern blot membrane probed with probe *vc2478,5*. Lanes: *wc*, whole cell RNA extract; 1 - 5: samples originating from each of the numbered density gradient fractions described in A.

**Supplementary Data Fig. S3.** Illustrations of vesicle RNA (isolated from *V. cholerae* strain A1552) sequences aligned to chromosomal DNA sequences of *V. cholerae* N16961 strain. Red alignments are in the sense direction, blue alignments are in the anti-sense direction. \*: Height indicates the number of sequences aligned. **A.** Typical alignment view **B.** Region *vc2478 – vc2479* **C.** Region *vc0190 – vc0191* **D.** Region *vca0526 – vca0527*.

**Supplementary Data Fig. S4.** RNA extracted from an overnight culture of *Vibrio cholerae* O1 El Tor A1552 whole cells (*wc*) and vesicles (*v*) using the Total RNA Norgen kit. RNA from whole cells (5 µg) and RNA from vesicles (3.5µg) were run on a 12 % polyacrylamide denaturing gel stained in GelRed (panel A). The RNA was transferred to a membrane that was probed with probe *vc2478,5* (panel B) and consecutively re-probed first with probe *vc0190,5* (panel C) and then with probe *vca0526,5* (panel D).

**Supplementary Data Fig. 5. DNase I treatment of RNA extracted from bacterial vesicles.** PCR analysis for detection of DNA in RNA samples extracted from vesicles released by *Vibrio cholerae* O1 El Tor strain A1552. The analysis was performed before (lanes 2 & 3) and after (lanes 4 & 5) treatment with DNase I. PCR products after amplifications using *ompU* primers (lanes 2 & 4) or *vc2478,5* primers (lanes 3 & 5) were analysed on a 1% agarose gel. Lane 1 shows a GeneRuler™ DNA Ladder (Fermentas).

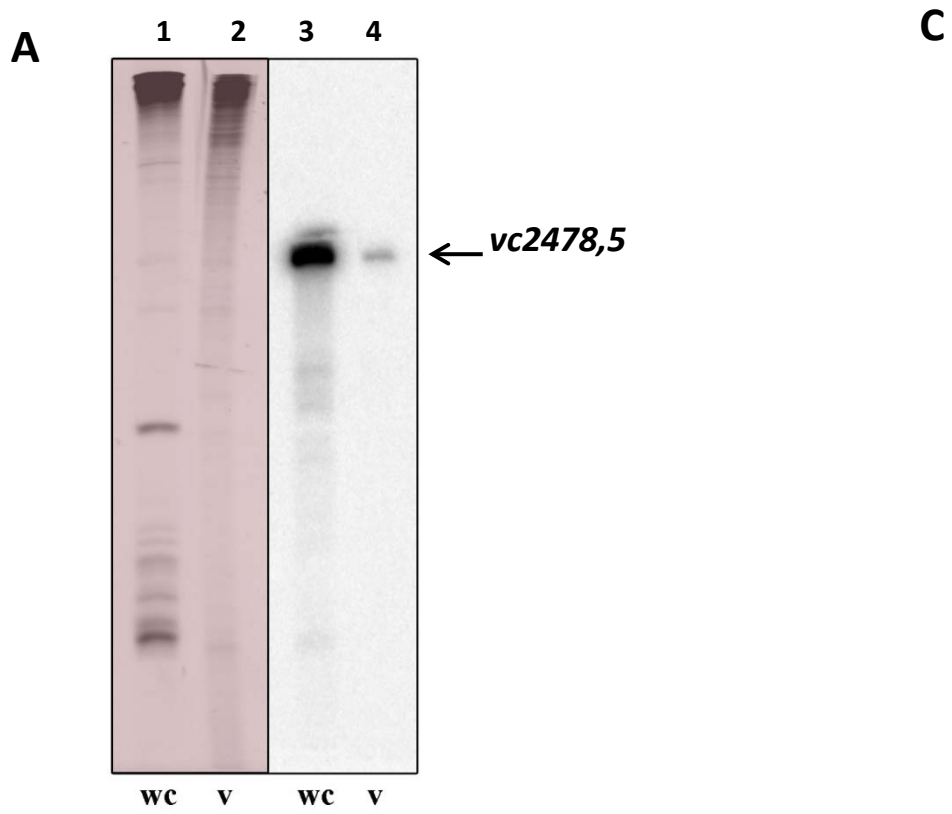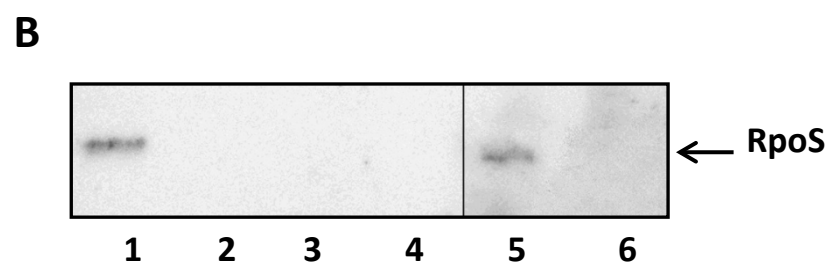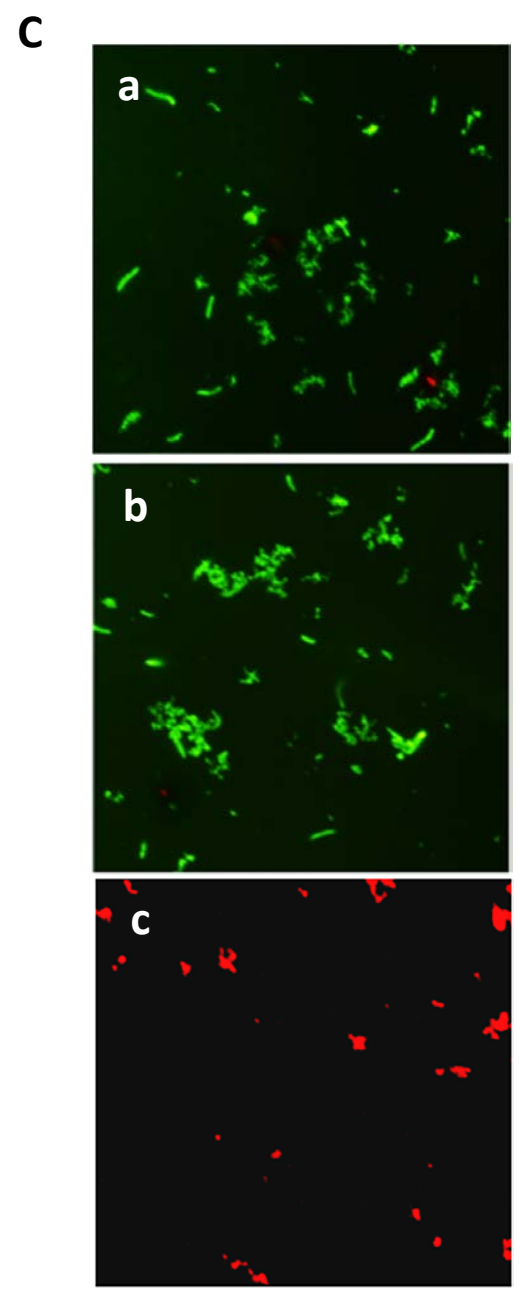

Supplementary Fig. S1

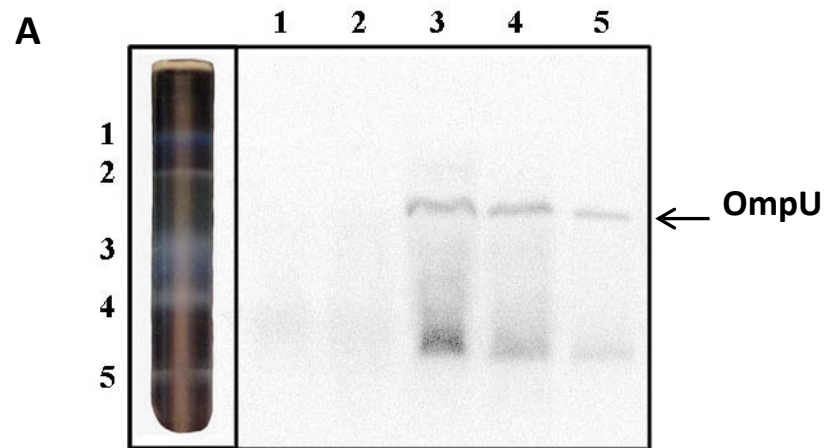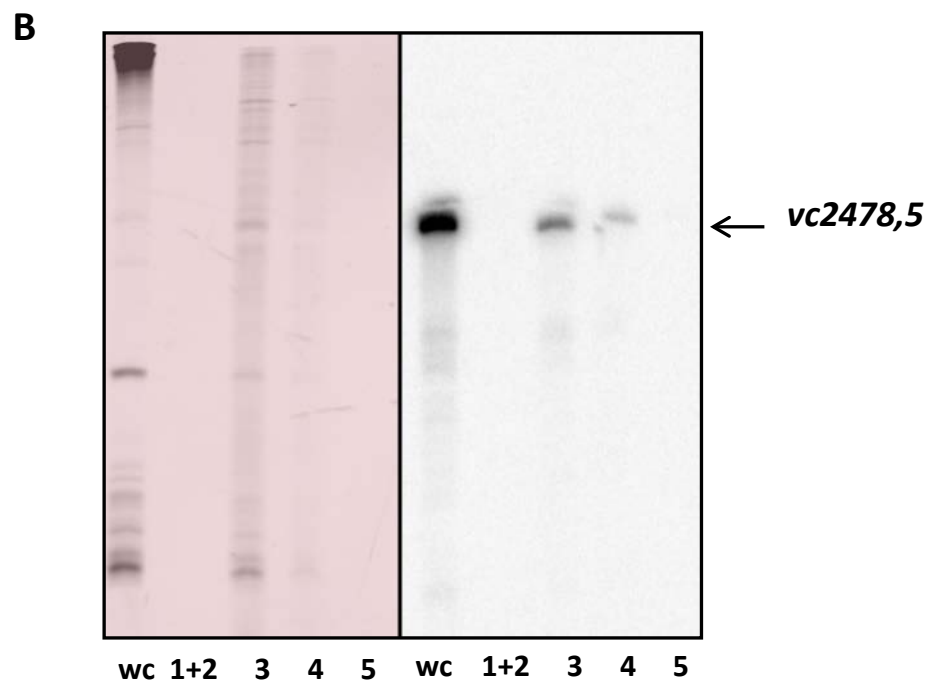

Supplementary Fig. S2

**a**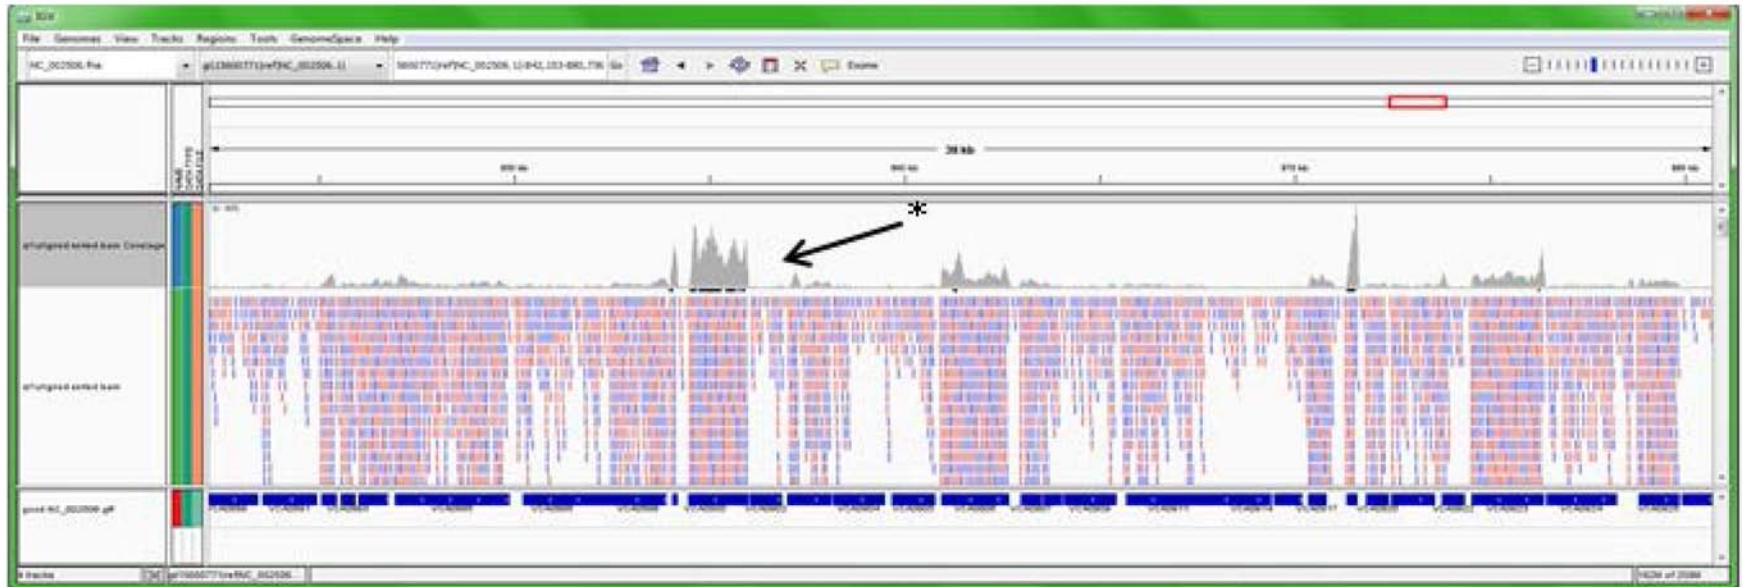**b**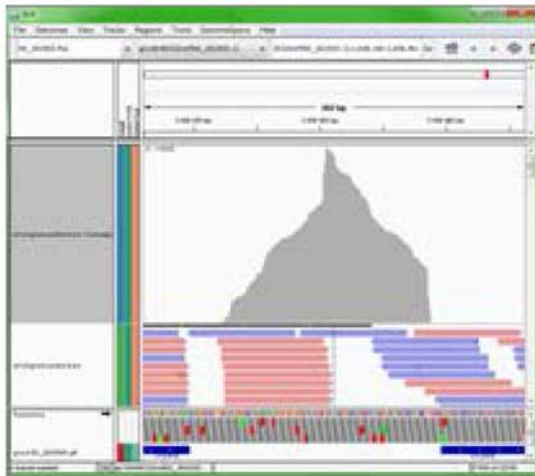**c**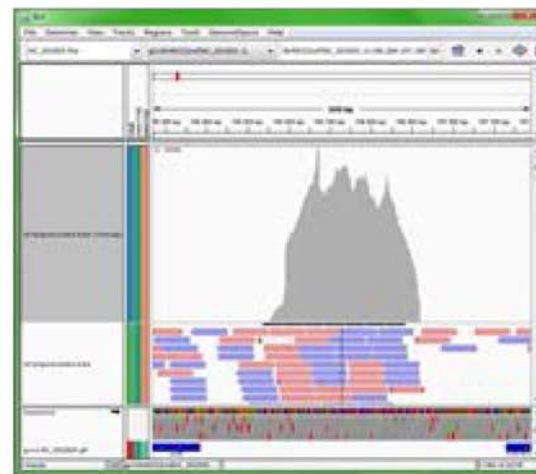**d**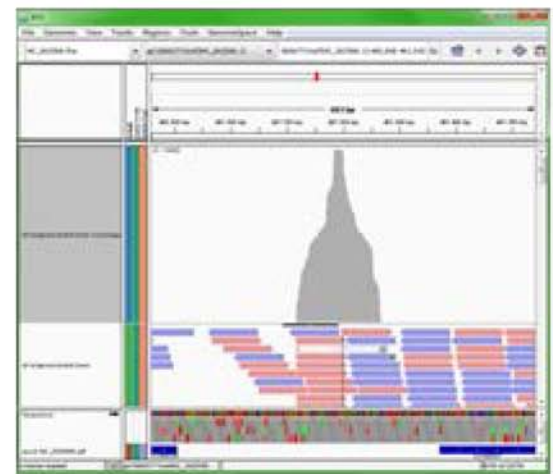

Supplementary Fig. S3

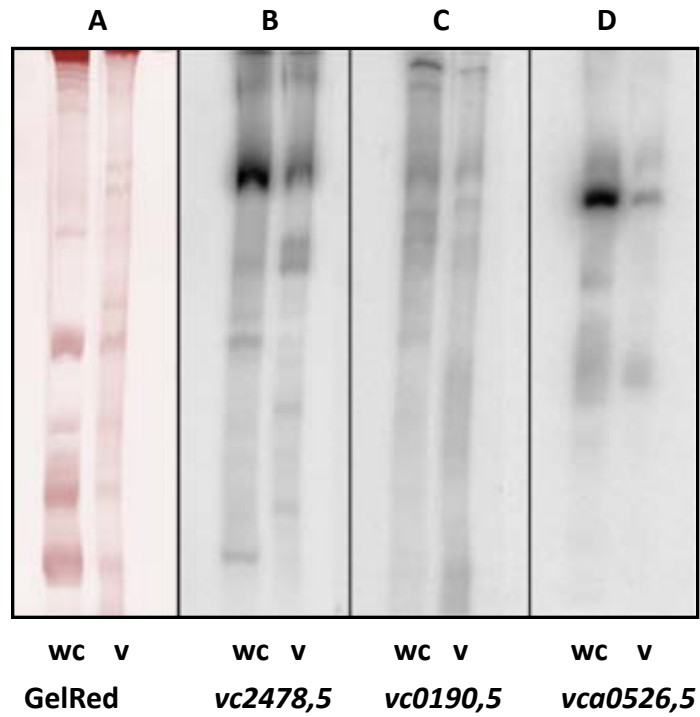

**Supplementary Fig. S4**



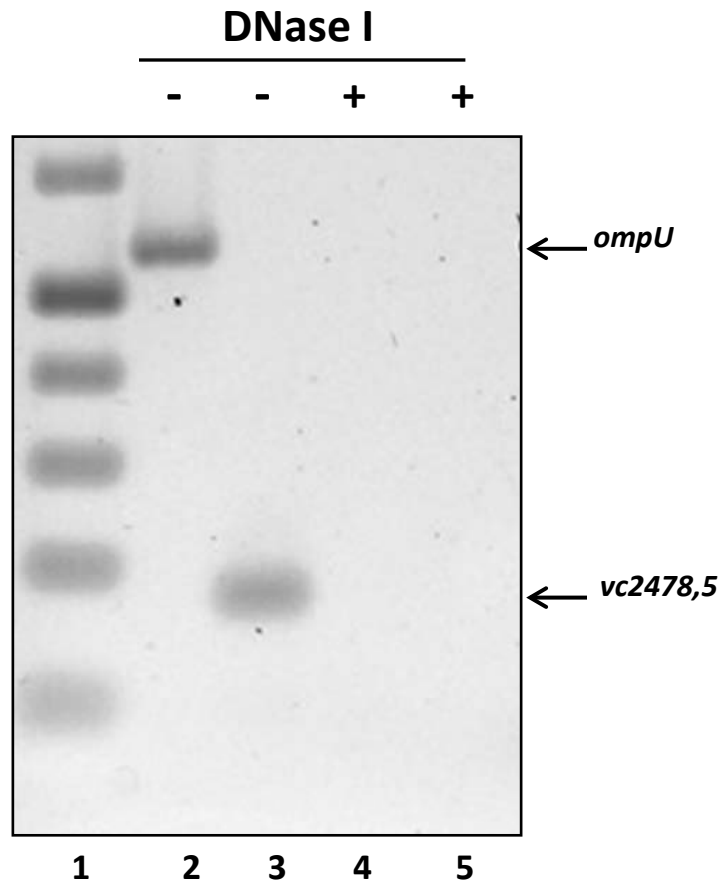

**Supplementary Fig. S5**

**Supplementary Table 1a.** Alignment of sequenced vesicle RNA to *V. cholerae* N16961 chromosome I.

| Peak    | Start   | End     | Region in N16961 chromosome I                                                                |                |
|---------|---------|---------|----------------------------------------------------------------------------------------------|----------------|
| 1090000 | 2658225 | 2658386 | upstream of uncharacterized protein <b>vc2479</b>                                            | 6S RNA         |
| 120000  | 196545  | 196933  | intergenic region between <b>vc0190</b> and <b>vc0191</b>                                    | CsrB           |
| 111000  | 914315  | 914654  | upstream of phage integrase family <b>vc0847</b>                                             | SrsA           |
| 41500   | 943857  | 944200  | uncharacterized protein <b>vc0883</b>                                                        | CsrB           |
| 41200   | 2375908 | 2376115 | uncharacterized protein <b>vc2221</b>                                                        |                |
| 37800   | 2580714 | 2581110 | upstream of uncharacterized protein <b>vc2410</b>                                            | svch2581.1     |
| 23500   | 1588979 | 1589272 | ribosome modulating factor <b>vc1484</b>                                                     |                |
| 17800   | 69300   | 69684   | multidrug resistant protein <b>vc0069</b>                                                    |                |
| 13000   | 2334461 | 2334692 | downstream of flagellin A <b>vc2188</b>                                                      |                |
| 12100   | 954751  | 954916  | uncharacterized protein <b>vc0895</b>                                                        | GcvB           |
| 9400    | 36506   | 36828   | uncharacterized protein <b>vc0038</b>                                                        |                |
| 7300    | 1578748 | 1578913 | intergenic region between <b>vc1470</b> and <b>vc1471</b>                                    | svch1579.1 & 2 |
| 7150    | 1584873 | 1585042 | intergenic region between <b>vc1478</b> and <b>vc1479</b>                                    |                |
| 6700    | 2619094 | 2619268 | uncharacterized protein <b>vc2440</b>                                                        |                |
| 6200    | 381650  | 382992  | elongation factor Tu-B <b>vc0362</b>                                                         |                |
| 5600    | 1719935 | 1720319 | uncharacterized protein <b>vc1605a</b>                                                       |                |
| 5480    | 1992699 | 1993856 | putative porin <b>vc1854</b>                                                                 |                |
| 5100    | 1185676 | 1185924 | putative glutaredoxin <b>vc1116</b>                                                          |                |
| 5000    | 335290  | 336538  | elongation factor Tu-A <b>vc0321</b>                                                         |                |
| 4300    | 612554  | 613240  | pseudo <b>vc0583</b>                                                                         | svch613.1 & 2  |
| 4000    | 1300189 | 1300577 | integration host factor subunit alfa <b>vc1222</b>                                           |                |
| 3700    | 674802  | 675992  | outer membrane protein <b>vc0633</b>                                                         |                |
| 3280    | 1471635 | 1471788 | uncharacterized protein <b>vc1378</b>                                                        |                |
| 3100    | 2956240 | 2956682 | ATP synthase FOF1 subunit I <b>vc2771</b>                                                    |                |
| 3010    | 2174106 | 2174453 | acyl carrier protein <b>vc2020</b>                                                           |                |
| 2930    | 2332957 | 2334180 | flagellin C <b>vc2187</b>                                                                    |                |
| 2580    | 1318751 | 1319201 | uncharacterized protein <b>vc1247</b>                                                        |                |
| 2280    | 2517106 | 2517539 | autonomous glycyl radical cofactor <b>vc2361</b>                                             |                |
| 2260    | 2365289 | 2366647 | outer membrane protein <b>vc2213</b>                                                         |                |
| 2190    | 762615  | 762798  | uncharacterized protein <b>vc0713</b>                                                        |                |
| 2000    | 1538123 | 1539689 | cbb-3 type Cytochrome c oxidase, subunit II <b>vc1442</b>                                    |                |
| 1980    | 1417217 | 1417374 | upstream of uncharacterized protein <b>vc1333</b>                                            |                |
| 1970    | 222697  | 222833  | coenzyme A biosynthesis bifunctional protein <b>vc0215</b>                                   |                |
| 1940    | 2063226 | 2063618 | integration host factor subunit beta <b>vc1914</b>                                           |                |
| 1910    | 2295417 | 2295764 | flagellar capping protein <b>vc2140</b>                                                      |                |
| 1880    | 2754248 | 2755599 | preprotein translocase subunit <b>vc2576</b>                                                 |                |
| 1800    | 1408994 | 1410076 | galactoside ABC transporter, periplasmic D-galactose/D-glucose-binding protein <b>vc1325</b> |                |
| 1780    | 102446  | 102657  | putative uncharacterized protein <b>vc0107</b>                                               | RyhB & Spot_42 |
| 1750    | 1198128 | 1198673 | DNA binding protein <b>vc1130</b>                                                            |                |
| 1690    | 1211912 | 1212296 | cold shock-like protein <b>vc1142</b>                                                        |                |
| 1680    | 2295764 | 2296334 | flagellar protein <b>vc2141</b>                                                              |                |
| 1650    | 2068862 | 2069279 | DNA-binding protein HU-beta <b>vc1919</b>                                                    |                |

|      |         |         |                                                                                                  |            |
|------|---------|---------|--------------------------------------------------------------------------------------------------|------------|
| 1650 | 2909984 | 2911682 | Phosphoenolpyruvate carboxykinase [ATP] <b>vc2738</b>                                            |            |
| 1600 | 1458356 | 1458653 | uncharacterized protein <b>vc1368</b>                                                            |            |
| 1500 | 86471   | 87681   | cytochrome peroxidase c551 <b>vc0089</b>                                                         |            |
| 1490 | 1670845 | 1673232 | catalase/peroxidase <b>vc1560</b>                                                                |            |
| 1480 | 1794805 | 1795288 | heat shock protein <b>vc1663</b>                                                                 |            |
| 1470 | 2163539 | 2163748 | uncharacterized protein <b>vc2009</b>                                                            |            |
| 1400 | 786571  | 787319  | antioxidant ahp CTSA family protein <b>vc0731</b>                                                |            |
| 1390 | 1536322 | 1537322 | cbb-3 type Cytochrome c oxidase, subunit P <b>vc1439</b>                                         |            |
| 1390 | 2949663 | 2950113 | ATP synthase F0F1 subunit epsilon <b>vc2763</b>                                                  |            |
| 1370 | 2713024 | 2713375 | RNA polymerase factor sigma-54 <b>vc2529</b>                                                     |            |
| 1330 | 1537495 | 1538123 | cbb-3 type Cytochrome c oxidase, subunit II <b>vc1441</b>                                        |            |
| 1330 | 2448193 | 2449428 | Na(+)-translocating NADH-quinone reductase subunit <b>vc2294</b>                                 |            |
| 1260 | 1537322 | 1537495 | cbb-3 type Cytochrome c oxidase, subunit Q <b>vc1440</b>                                         |            |
| 1260 | 2152257 | 2153283 | glyceraldehyde-3-phosphate dehydrogenase <b>vc2000</b>                                           |            |
| 1250 | 2249553 | 2250272 | succinate dehydrogenase iron-sulfur subunit <b>vc2088</b>                                        |            |
| 1240 | 580419  | 580787  | upstream of and the whole carbon storage regulator <b>vc0548</b>                                 |            |
| 1230 | 1644504 | 1644628 | intergenic region between <b>vc1531</b> and <b>vc1532</b>                                        |            |
| 1200 | 1097620 | 1099948 | zink/cadmium/mercury/lead-transporting ATPase <b>vc1033</b>                                      |            |
| 1190 | 2449428 | 2450823 | Na(+)-translocating NADH-quinone reductase subunit A <b>vc2295</b>                               |            |
| 1180 | 2221154 | 2221925 | flagellar biosynthesis sigma factor <b>vc2066</b>                                                |            |
| 1140 | 1031609 | 1031884 | phosphocarrier protein HPr <b>vc0966</b>                                                         |            |
| 1140 | 2394692 | 2394907 | downstream of cytochrome c554 <b>vc2241</b>                                                      |            |
| 1140 | 2669986 | 2670098 | upstream of 2-isopropylmalate synthase <b>vc2490</b>                                             | svch2670.1 |
| 1120 | 1597539 | 1602466 | uncharacterized protein <b>vc1492</b>                                                            |            |
| 1100 | 1029112 | 1029661 | PTS system glucos-specific IIA component <b>vc0964</b>                                           |            |
| 1100 | 2657848 | 2658199 | uncharacterized protein <b>vc2478</b>                                                            |            |
| 1090 | 1838582 | 1838921 | uncharacterized protein <b>vc1707</b>                                                            |            |
| 1070 | 564258  | 564667  | lipoprotein <b>vc0533</b>                                                                        |            |
| 1070 | 2152042 | 2152257 | putative uncharacterized protein <b>vc1999</b>                                                   |            |
| 1070 | 2564959 | 2565969 | cell division protein <b>vc2397</b>                                                              |            |
| 1060 | 2564178 | 2564959 | UDP-3-O-[3-hydroxymyristoyl] N-acetylglucosamine deacetylase <b>vc2396</b>                       |            |
| 1050 | 2166629 | 2168114 | PTS system glucose-specific transporter subunit IIBC <b>vc2013</b>                               |            |
| 1020 | 2297656 | 2298854 | flagellin D <b>vc2143</b>                                                                        |            |
| 1000 | 2296334 | 2297482 | flagellin B <b>vc2142</b>                                                                        |            |
| 1000 | 462204  | 463183  | malate dehydrogenase <b>vc0432</b>                                                               |            |
| 1000 | 1520426 | 1520674 | intergenic region between <b>vc1422</b> and <b>vc1423</b>                                        | svch1521.1 |
| 1000 | 1111516 | 1112882 | long-chain fatty acid transport protein <b>vc1043</b>                                            |            |
| 1000 | 756233  | 756588  | sigma-54 modulation protein <b>vc0706</b>                                                        |            |
| 980  | 2253168 | 2254463 | type II citrate synthase <b>vc2092</b>                                                           |            |
| 950  | 2420154 | 2420290 | upstream of uncharacterized protein <b>vc2264</b>                                                |            |
| 950  | 1310940 | 1311270 | upstream of nicotinate-nucleotide--dimethylbenzimidazole phosphoribosyltransferase <b>vc1237</b> |            |
| 930  | 2654106 | 2654548 | uncharacterized protein <b>vc2473</b>                                                            |            |
| 920  | 2019596 | 2019906 | SpoVR family protein <b>vc1874</b>                                                               |            |
| 920  | 1447024 | 1447739 | uncharacterized membrane protein <b>vc1358</b>                                                   |            |
| 910  | 2394907 | 2395221 | cytochrome c554 <b>vc2241</b>                                                                    |            |
| 910  | 1650724 | 1651517 | uncharacterized protein <b>vc1539</b>                                                            | svch1651.1 |
| 890  | 2252361 | 2252772 | succinate dehydrogenase cytochrome b556 subunit <b>vc2091</b>                                    |            |

|     |         |         |                                                                              |                |
|-----|---------|---------|------------------------------------------------------------------------------|----------------|
| 870 | 1214761 | 1215323 | ATP-dependent Clp protease ATP-binding subunit <b>vc1144</b>                 |                |
| 870 | 1608509 | 1609145 | solute/DNA competence effector, protein ProQ homolog <b>vc1497</b>           |                |
| 870 | 76886   | 77365   | ferritin <b>vc0078</b>                                                       |                |
| 860 | 305064  | 307130  | acetyl-CoA synthetase <b>vc0298</b>                                          |                |
| 850 | 2071844 | 2073125 | ATP-dependent protease ATP-binding subunit <b>vc1921</b>                     |                |
| 830 | 2864880 | 2866417 | aspartate ammonia-lyase <b>vc2698</b>                                        |                |
| 830 | 278425  | 278694  | DNA binding HU-alfa <b>vc0273</b>                                            |                |
| 820 | 2444902 | 2446158 | Na(+)-translocating NADH-quinone reductase subunit <b>vc2290</b>             |                |
| 810 | 1021356 | 1022017 | uncharacterized protein <b>vc0957</b>                                        |                |
| 810 | 1814878 | 1815035 | peptide ABC transporter substrate-binding protein <b>vc1680</b>              |                |
| 810 | 2764786 | 2765042 | upstream of <b>vc2597</b>                                                    | svch2765.1     |
| 800 | 1832388 | 1832689 | uncharacterized protein <b>vc1699</b>                                        |                |
| 800 | 76031   | 76651   | universal stress protein A <b>vc0076</b>                                     |                |
| 780 | 139954  | 140888  | RNA polymerase sigma factor-32 <b>vc0150</b>                                 |                |
| 770 | 2713375 | 2713710 | sigma-54 modulation protein <b>vc2530</b>                                    |                |
| 760 | 435431  | 435989  | MSHA pilin protein <b>vc0409</b>                                             |                |
| 740 | 1451138 | 1452295 | amino acid ABC transporter substrate binding protein <b>vc1362</b>           |                |
| 740 | 1158698 | 1160377 | oligopeptide ABC transporter substrate binding protein <b>vc1091</b>         |                |
| 730 | 633774  | 636488  | bifunctional aconitate hydratase 2/2 methylisocitrate <b>vc0604</b>          |                |
| 730 | 2081097 | 2082120 | C4-dicarboxylate-binding periplasmic protein <b>vc1929</b>                   |                |
| 720 | 2834286 | 2834637 | co-chaperonin, 10 kDa chaperonin 1 <b>vc2665</b>                             |                |
| 720 | 1135448 | 1135547 | upstream of ArsR family transcriptional regulator <b>vc1068</b>              | svch1136.1 & 2 |
| 720 | 2178616 | 2179044 | uncharacterized protein <b>vc2026</b>                                        |                |
| 700 | 2955395 | 2956240 | ATP synthase F0F1 subunit A <b>vc2770</b>                                    |                |
| 700 | 2447420 | 2448193 | Na(+)-translocating NADH-quinone reductase subunit <b>vc2293</b>             |                |
| 700 | 383504  | 384000  | bactoferritin <b>vc0365</b>                                                  |                |
| 700 | 132719  | 133283  | DPS family protein <b>vc0139</b>                                             |                |
| 700 | 554239  | 554693  | uncharacterized protein <b>vc0519</b>                                        |                |
| 700 | 2014929 | 2016993 | uncharacterized protein <b>vc1872</b>                                        |                |
| 680 | 2954571 | 2955048 | ATP synthase F0F1 subunit B <b>vc2768</b>                                    |                |
| 680 | 2446782 | 2447420 | Na(+)-translocating NADH-quinone reductase subunit <b>vc2292</b>             |                |
| 670 | 692148  | 692445  | polyribonucleotide nucleotidyltransferase <b>vc0647</b>                      |                |
| 670 | 2877100 | 2878819 | putative Sodium/solute symporter <b>vc2705</b>                               |                |
| 650 | 2626588 | 2627926 | enolase <b>vc2447</b>                                                        |                |
| 630 | 2832601 | 2834286 | molecular chaperone <b>vc2664</b>                                            |                |
| 630 | 1332776 | 1332950 | DNA gyrase subunit A <b>vc1258</b>                                           |                |
| 630 | 2203125 | 2203796 | superoxide dismutase <b>vc2045</b>                                           | svch2204.1     |
| 620 | 380939  | 381650  | elongation factor G1 <b>vc0361</b>                                           |                |
| 620 | 500283  | 500485  | S-adenosylmethionine synthetase <b>vc0472</b>                                |                |
| 610 | 1319201 | 1320911 | methyl-accepting chemotaxis protein <b>vc1248</b>                            |                |
| 600 | 2950113 | 2951534 | ATP synthase F0F1 subunit beta <b>vc2764</b>                                 |                |
| 600 | 2495392 | 2497494 | elongation factor G 2 <b>vc2342</b>                                          |                |
| 600 | 2501622 | 2501760 | intergenic region inbetween <b>vc2344</b> and <b>vc2345</b>                  |                |
| 590 | 2250272 | 2252031 | succinate dehydrogenase flavoprotein subunit <b>vc2089</b>                   |                |
| 590 | 2450823 | 2450982 | upstream of Na(+)-translocating NADH-quinone reductase subunit <b>vc2295</b> |                |
| 590 | 2892438 | 2892948 | uncharacterized protein <b>vc2717</b>                                        |                |
| 580 | 2347213 | 2348056 | chemotaxis protein methyltransferase 1 <b>vc2201</b>                         |                |

|     |         |         |                                                                                                        |                       |
|-----|---------|---------|--------------------------------------------------------------------------------------------------------|-----------------------|
| 560 | 1374791 | 1375004 | upsteam of phosphomethylpyrimidine kinase <b>vc1296</b>                                                | <b>TPP riboswitch</b> |
| 560 | 1321079 | 1321598 | uncharacterized protein <b>vc1249</b>                                                                  |                       |
| 550 | 2344123 | 2345436 | <b>flagellar hook protein vc2197</b>                                                                   |                       |
| 550 | 2187578 | 2190491 | bifunctional acetaldehyde-CoA/alcohol dehydrogenase <b>vc2033</b>                                      |                       |
| 550 | 1283771 | 1284105 | ds-DNA mimic protein <b>vc1208</b>                                                                     |                       |
| 540 | 1477000 | 1477430 | uncharacterized protein <b>vc1384</b>                                                                  |                       |
| 540 | 2041347 | 2041496 | intergenic region inbetween and parts of uncharacterized proteins <b>vc1893</b> and <b>vc1894</b>      |                       |
| 530 | 1523028 | 1524280 | spermidine/putrescine ABC transporter, periplasmic spermidine/putrescine-binding protein <b>vc1425</b> |                       |
| 530 | 1257042 | 1257620 | uncharacterized protein <b>vc1183</b>                                                                  |                       |
| 520 | 1651869 | 1652043 | uncharacterized protein <b>vc1539a</b>                                                                 |                       |
| 520 | 2952435 | 2954047 | ATP synthase FOF1 subunit alfa <b>vc2766</b>                                                           |                       |
| 520 | 623301  | 623784  | DnaK suppressor protein <b>vc0596</b>                                                                  |                       |
| 520 | 2334684 | 2335901 | <b>flagellin A vc2188</b>                                                                              |                       |
| 510 | 133961  | 134317  | uncharacterized protein <b>vc0142</b>                                                                  |                       |
| 510 | 2083993 | 2084133 | uncharacterized protein <b>vc1932</b>                                                                  |                       |
| 510 | 952618  | 952804  | chemotaxis protein <b>vc0893</b>                                                                       |                       |
| 500 | 2955048 | 2955395 | ATP synthase FOF1 subunit C <b>vc2769</b>                                                              |                       |
| 500 | 2334692 | 2336031 | <b>flagellin B vc2142</b>                                                                              |                       |
| 500 | 317733  | 318109  | thioredoxin <b>vc0306</b>                                                                              |                       |
| 490 | 1300020 | 1300189 | upstream of <b>vc1222</b>                                                                              |                       |
| 480 | 2327636 | 2327793 | 4-diphosphocytidyl-2-C-methyl-D-erythritol kinase <b>vc2182</b>                                        |                       |
| 470 | 2582987 | 2584882 | pyruvate dehydrogenase <b>vc2413</b>                                                                   |                       |
| 470 | 2951534 | 2952435 | ATP synthase FOF1 subunit gamma <b>vc2765</b>                                                          |                       |
| 470 | 2414371 | 2415329 | elongation factor Ts <b>vc2259</b>                                                                     |                       |
| 470 | 2006853 | 2009215 | formate acetyltransferase <b>vc1866</b>                                                                |                       |
| 470 | 935777  | 935909  | upstream of IS1004 transposase <b>vc0870</b>                                                           |                       |
| 460 | 2782151 | 2782911 | cAMP-regulatory protein <b>vc2614</b>                                                                  |                       |
| 460 | 107395  | 108097  | cytochrome c4 <b>vc0112</b>                                                                            |                       |
| 450 | 2783856 | 2784067 | N-succinylglutamate 5-semialdehyde dehydrogenase <b>vc2616</b>                                         |                       |
| 450 | 2954047 | 2954571 | ATP synthase FOF1 subunit delta <b>vc2767</b>                                                          |                       |
| 450 | 2856763 | 2857292 | 6-phosphofructokinase <b>vc2689</b>                                                                    |                       |
| 450 | 1976501 | 1977100 | peptidoglycan-associated lipoprotein <b>vc1835</b>                                                     |                       |
| 440 | 1385378 | 1386948 | putative fumarate hydratase, class I <b>vc1304</b>                                                     |                       |
| 440 | 2393494 | 2393849 | nitrogen regulatory protein P-II <b>vc2239</b>                                                         |                       |
| 430 | 1530646 | 1531594 | putative stress protein <b>vc1433</b>                                                                  |                       |
| 415 | 2055506 | 2056621 | alanine dehydrogenase <b>vc1905</b>                                                                    |                       |
| 410 | 1050496 | 1051173 | Adenylate kinase <b>vc0986</b>                                                                         |                       |
| 410 | 77365   | 77729   | universal stress protein B, ppGpp-dependent, membrane associated <b>vc0079</b>                         |                       |
| 400 | 2348056 | 2349080 | chemotaxis protein <b>vc2202</b>                                                                       |                       |
| 400 | 803130  | 803283  | HesB family protein <b>vc0750</b>                                                                      |                       |
| 400 | 1100574 | 1101161 | uridine phosphorylase <b>vc1034</b>                                                                    |                       |
| 390 | 354674  | 355141  | 2,3-bisphosphoglycerate-independent phosphoglycerate mutase <b>vc0336</b>                              |                       |
| 390 | 2130297 | 2130520 | putative aspartate amino transferase <b>vc1977</b>                                                     |                       |
| 390 | 302338  | 302528  | Acetyl-CoA carboxylase, biotin carboxylase <b>vc0295</b>                                               |                       |
| 390 | 2513905 | 2514095 | uncharacterized protein <b>vc2357</b>                                                                  |                       |
| 380 | 2218550 | 2219998 | chemotaxis protein <b>vc2063</b>                                                                       |                       |
| 380 | 2610643 | 2611874 | outer membrane channel protein <b>vc2436</b>                                                           |                       |

|     |         |         |                                                                           |             |
|-----|---------|---------|---------------------------------------------------------------------------|-------------|
| 370 | 2944713 | 2945721 | 3-ketoacyl-CoA thiolase <b>vc2759</b>                                     |             |
| 370 | 2343586 | 2343966 | flagellar basal-body rod protein <b>vc2196</b>                            |             |
| 370 | 1801911 | 1802093 | intergenic region between <b>vc1669</b> and <b>vc1670</b>                 |             |
| 350 | 564667  | 565745  | RNA polymerase sigma factor-38 <b>vc0534</b>                              |             |
| 350 | 348760  | 349396  | anti-RNA polymerase sigma 70 factor <b>vc0330</b>                         |             |
| 350 | 96097   | 97811   | methyl accepting chemotaxis protein <b>vc0098</b>                         |             |
| 340 | 2581316 | 2582415 | dihydrolipoyl dehydrogenase <b>vc2412</b>                                 |             |
| 340 | 2446158 | 2446782 | Na(+)-translocating NADH-quinone reductase subunit <b>vc2291</b>          |             |
| 330 | 2524608 | 2525234 | aerobic respiration control protein <b>vc2368</b>                         |             |
| 330 | 2345436 | 2346180 | basal-body rod modification protein <b>vc2198</b>                         |             |
| 330 | 1407889 | 1408268 | uncharacterized proteins <b>vc1322</b> and <b>vc1323</b>                  |             |
| 330 | 2143461 | 2143732 | uncharacterized protein <b>vc1991</b>                                     |             |
| 320 | 2584882 | 2587569 | pyruvate dehydrogenase E1 component <b>vc2414</b>                         |             |
| 320 | 792153  | 792676  | putative Acetoin utilization protein <b>vc0737</b>                        |             |
| 320 | 1381458 | 1382755 | serine transporter <b>vc1301</b>                                          |             |
| 320 | 1396268 | 1396793 | methyl-accepting chemotaxis protein <b>vc1313</b>                         |             |
| 320 | 2799112 | 2799302 | DamX-related protein <b>vc2627</b>                                        |             |
| 310 | 2214140 | 2214592 | purine-binding chemotaxis protein <b>vc2059</b>                           |             |
| 310 | 1336667 | 1336810 | uncharacterized protein <b>vc1262</b>                                     |             |
| 300 | 2220725 | 2221154 | chemotaxis protein <b>vc2065</b>                                          |             |
| 300 | 1021344 | 1021482 | intergenic region between <b>vc0956</b> and <b>vc0957</b>                 |             |
| 290 | 2263005 | 2263276 | intergenic region between <b>vc2105</b> and <b>vc2106</b>                 |             |
| 280 | 1114605 | 1114725 | intergenic region between <b>vc1045</b> and <b>vc1046</b>                 |             |
| 280 | 1061324 | 1062905 | PTS systemN-acetylglucosamine-specific transporter subunit <b>vc0995</b>  |             |
| 280 | 2801124 | 2801281 | fimbrial assembly protein <b>vc2630</b>                                   |             |
| 280 | 132624  | 132718  | uncharacterized protein <b>vc0138</b>                                     |             |
| 270 | 665838  | 666197  | essential respiratory protein A, iron-sulfur insertion prot <b>vc0627</b> |             |
| 270 | 2346618 | 2347031 | flagellar basal body rod protein <b>vc2200</b>                            |             |
| 270 | 2221925 | 2222617 | site-determining protein <b>vc2067</b>                                    |             |
| 260 | 2587569 | 2588098 | pyruvate dehydrogenase complex repressor <b>vc2415</b>                    |             |
| 260 | 53506   | 53590   | uncharacterized protein <b>vc0059</b>                                     |             |
| 250 | 2349799 | 2350245 | negative regulator of flagellin synthesis <b>vc2204</b>                   |             |
| 250 | 2288320 | 2288626 | flagellar hook-basal body complex protein <b>vc2134</b>                   |             |
| 250 | 2627926 | 2628183 | CTP synthase <b>vc2448</b>                                                |             |
| 250 | 422634  | 423163  | single-stranded DNA-binding protein <b>vc0397</b>                         |             |
| 250 | 2420288 | 2420723 | UPF0325 protein <b>vc2264</b>                                             |             |
| 250 | 2252772 | 2252962 | upstream of <b>vc2091</b>                                                 |             |
| 250 | 937693  | 937804  | uncharacterized protein <b>vc0874</b>                                     |             |
| 240 | 2549464 | 2549770 | upstream of RNA-directed DNA polymerase <b>vc2385</b>                     | <b>IGR3</b> |
| 230 | 2839602 | 2840135 | regulator of ribonuclease activity A <b>vc2672</b>                        |             |
| 220 | 1401314 | 1402103 | outer membrane protein <b>vc1318</b>                                      |             |

**Peak:** the highest number of RNA sequences aligned to a specific nucleotide the region. **Grey box:** region contains a sRNA. **Start** and **end:** positions in the chromosome. **Orange box:** cytoplasmic location, **Blue box:**

inner membrane location, **Red box**: outer membrane location, **Purple box**: membrane, **Light yellow box**: pilus association, **Yellow box**: flagellar association, and **White box**: unknown location.

**Supplementary Table 1b.** Alignment of sequenced vesicle RNA to *V. cholerae* N16961 chromosome II.

| Peak   | Start   | End     | Region in N16961 chromosome II                                           |           |
|--------|---------|---------|--------------------------------------------------------------------------|-----------|
| 115300 | 461118  | 461267  | intergenic region between <b>vca0526</b> and <b>vca0527</b>              | svch462.1 |
| 92300  | 783813  | 784124  | uncharacterized protein <b>vca0839</b>                                   | CsrB      |
| 24200  | 886914  | 887278  | uncharacterized protein <b>vca0935</b>                                   |           |
| 19400  | 66495   | 66837   | major outer membrane lipoprotein <b>vca0059</b>                          |           |
| 8400   | 61091   | 61300   | uncharacterized protein <b>vca0052</b>                                   |           |
| 7590   | 1031448 | 1031574 | upstream of LuxR family transcriptional regulator <b>vca1078</b>         |           |
| 7500   | 308592  | 309077  | translation initiation factor IF-3 <b>vca0288</b>                        | LR-PK1    |
| 7000   | 485524  | 485763  | uncharacterized protein <b>vca0547</b>                                   | svch486.1 |
| 5800   | 213120  | 213285  | upstream of GMP reductase <b>vca0197</b>                                 | svch214.1 |
| 4650   | 893294  | 893459  | downstream of maltose transport system permease protein <b>vca0943</b>   | MicX      |
| 4220   | 817334  | 819261  | hemagglutinin/protease <b>vca0865</b>                                    |           |
| 3090   | 819602  | 820290  | outer membrane protein <b>vca0867</b>                                    |           |
| 2700   | 284969  | 285940  | methyl-accepting chemotaxis protein <b>vca0268</b>                       |           |
| 2180   | 627734  | 628099  | uncharacterized protein <b>vca0689</b>                                   |           |
| 2180   | 893459  | 893603  | maltose transport system permease protein <b>vca0943</b>                 | svch894.2 |
| 1670   | 834562  | 835685  | uncharacterized protein <b>vca0883</b>                                   |           |
| 1600   | 4061    | 4387    | uncharacterized protein <b>vca0004</b>                                   |           |
| 1430   | 308245  | 308592  | upstream of translation initiation factor IF-3 <b>vca0288</b>            |           |
| 1370   | 487754  | 488020  | uncharacterized protein <b>vca0551</b>                                   |           |
| 1140   | 203421  | 203797  | cold shock DNA-binding domain-containing protein <b>vca0184</b>          |           |
| 1100   | 39233   | 40071   | upstream of and uncharacterized protein <b>vca0032</b>                   |           |
| 1020   | 232124  | 232329  | upstream of uncharacterized protein <b>vca0213</b>                       | svch233.1 |
| 1010   | 994761  | 994875  | upstream of PTS system mannitol-specific EIICBA component <b>vca1045</b> | Mds       |
| 950    | 88629   | 89022   | uncharacterized protein <b>vca0078</b>                                   |           |
| 830    | 776851  | 776956  | uncharacterized protein <b>vca0831</b>                                   |           |
| 660    | 629320  | 630236  | acetyl-CoA reductase <b>vca0691</b>                                      |           |
| 630    | 833061  | 833490  | uncharacterized protein <b>vca0881</b>                                   |           |
| 610    | 628099  | 629320  | acetyl-CoA acetyltransferase <b>vca0690</b>                              |           |
| 580    | 971762  | 972073  | uncharacterized protein <b>vca1024</b>                                   |           |
| 560    | 532373  | 532660  | hemolysin <b>vca0594</b>                                                 |           |
| 550    | 237171  | 237395  | upstream of hemolysin <b>vca0219</b>                                     |           |
| 530    | 220268  | 220397  | pseudo <b>vca0203</b>                                                    |           |
| 510    | 684347  | 685544  | uncharacterized protein <b>vca0738</b>                                   |           |
| 500    | 508610  | 509011  | uncharacterized protein <b>vca0571</b>                                   |           |
| 500    | 871320  | 871655  | uncharacterized protein <b>vca0919</b>                                   |           |
| 500    | 929290  | 929858  | uncharacterized protein <b>vca0981</b>                                   |           |
| 490    | 1003717 | 1004369 | uncharacterized protein <b>vca1054</b>                                   |           |
| 480    | 546334  | 546515  | uncharacterized protein <b>vca0609</b>                                   |           |
| 450    | 556852  | 558082  | upstream of and transaldolase <b>vca0623</b>                             | svch557.1 |
| 430    | 702687  | 702937  | arginine ABC transporter, permease protein <b>vca0758</b>                |           |
| 420    | 833490  | 834562  | uncharacterized protein <b>vca0882</b>                                   |           |
| 410    | 678373  | 678819  | uncharacterized protein <b>vca0732</b>                                   |           |
| 400    | 89052   | 90407   | uncharacterized protein <b>vca0079</b>                                   |           |
| 400    | 204597  | 205022  | uncharacterized protein <b>vca0186</b>                                   |           |
| 400    | 760422  | 760987  | agmatinase <b>vca0814</b>                                                |           |



|     |         |         |                                                                                                         |           |
|-----|---------|---------|---------------------------------------------------------------------------------------------------------|-----------|
| 390 | 292709  | 292829  | upstream of IS1004 transposase <b>vca0275</b>                                                           |           |
| 390 | 854501  | 855376  | uncharacterized protein <b>vca0900</b>                                                                  |           |
| 370 | 38714   | 39233   | methyl-accepting chemotaxis protein <b>vca0031</b>                                                      |           |
| 370 | 508251  | 508610  | translation initiation factor Sui1 <b>vca0570</b>                                                       |           |
| 360 | 1050275 | 1050461 | chemotaxis protein <b>vca1095</b>                                                                       |           |
| 360 | 1052862 | 1053168 | uncharacterized protein <b>vca1097</b>                                                                  |           |
| 350 | 1068928 | 1069971 | spermidine/putrescine ABC transporter, periplasmic spermidine/putrescine-binding protein <b>vca1113</b> |           |
| 340 | 1029148 | 1029441 | uncharacterized protein <b>vca1075</b>                                                                  |           |
| 330 | 713202  | 713355  | uncharacterized protein <b>vca0769</b>                                                                  |           |
| 320 | 42217   | 43058   | uncharacterized protein <b>vca0034</b>                                                                  |           |
| 320 | 760210  | 760373  | intergenic region between <b>vca0813</b> and <b>vca0814</b>                                             |           |
| 320 | 601944  | 602091  | probable anaerobic C4-dicarboxylate transporter <b>vca0665</b>                                          |           |
| 310 | 787274  | 787400  | downstream of glyceraldehyde 3-phosphate dehydrogenase <b>vca0844</b>                                   |           |
| 310 | 86599   | 86766   | sulfate permease family protein <b>vca0077</b>                                                          |           |
| 300 | 471351  | 471626  | Sec-independent protein translocase protein <b>vca0533</b>                                              |           |
| 300 | 1068580 | 1068928 | tRNA(Met) cytidine acetyltransferase <b>vca1112</b>                                                     |           |
| 290 | 295897  | 296280  | glycine cleavage system H protein <b>vca0277</b>                                                        |           |
| 290 | 855376  | 856001  | uncharacterized protein <b>vca0901</b>                                                                  |           |
| 280 | 184104  | 184447  | cold shock transcriptional regulator <b>vca0166</b>                                                     |           |
| 280 | 483866  | 484022  | upstream of uncharacterized protein <b>vca0546</b>                                                      | svch484.1 |
| 280 | 750895  | 751260  | uncharacterized protein <b>vca0806</b>                                                                  |           |
| 280 | 1049376 | 1049696 | purine-binding chemotaxis protein <b>vca1093</b>                                                        |           |
| 270 | 1026467 | 1026730 | bifunctional proline dehydrogenase/pyrroline-5-carboxylate dehydrogenase <b>vca1073</b>                 |           |
| 270 | 637183  | 637351  | upstream of Glucose-1-phosphate adenylyltransferase 2 <b>vca0699</b>                                    |           |
| 260 | 993053  | 993422  | Ccm2-related protein <b>vca1042</b>                                                                     |           |
| 260 | 897542  | 897683  | intergenic region between <b>vca0945</b> and <b>vca0946</b>                                             |           |
| 260 | 969225  | 969635  | uncharacterized protein <b>vca1021</b>                                                                  |           |
| 250 | 854000  | 854194  | uncharacterized protein <b>vca0899</b>                                                                  |           |
| 240 | 194828  | 195055  | uncharacterized protein <b>vca0177</b>                                                                  |           |
| 240 | 531212  | 532265  | uncharacterized protein <b>vca0593</b>                                                                  |           |
| 240 | 1021264 | 1021692 | sodium/proline symporter <b>vca1071</b>                                                                 |           |
| 240 | 1022765 | 1023456 | uncharacterized protein <b>vca1072</b>                                                                  |           |
| 230 | 333994  | 334479  | uncharacterized protein <b>vca0332</b>                                                                  |           |
| 230 | 580379  | 580807  | uncharacterized protein <b>vca0645</b>                                                                  |           |
| 230 | 876133  | 876422  | methyl-accepting chemotaxis protein <b>vca0923</b>                                                      |           |
| 220 | 860933  | 861670  | methyl-accepting chemotaxis protein <b>vca0906</b>                                                      |           |
| 220 | 832592  | 833042  | uncharacterized protein <b>vca0880</b>                                                                  |           |
| 210 | 180156  | 180453  | upstream of tryptophanase <b>vca0161</b>                                                                |           |

**Peak:** the highest number of RNA sequences aligned to a specific nucleotide the region. **Grey box:** region contains a sRNA. **Start and end:** positions in the chromosome. **Orange box:** cytoplasmic location, **Red box:** outer membrane location, **Blue box:** inner membrane location, **Light blue box:** periplasmic location, **Purple box:** membrane, **Green box:** secreted protein, and **White box:** unknown location.



## Supplemental References

- Amako, K., Meno, Y., and Takade, A. (1988). Fine structures of the capsules of *Klebsiella pneumoniae* and *Escherichia coli* K1. *J. Bacteriol.* *170*, 4960–4962.
- Benson, S.A., and Decloux, A. (1985). Isolation and characterization of outer membrane permeability mutants in *Escherichia coli* K-12. *J. Bacteriol.* *161*, 361–367.
- Bolivar, F., Rodriguez, R.L., Greene, P.J., Betlach, M.C., Heyneker, H.L., Boyer, H.W., Crosa, J.H., and Falkow, S. (1977). Construction and characterization of new cloning vehicles. II. A multipurpose cloning system. *Gene* *2*: 95–113.
- Casadaban, M.J. (1976). Transposition and fusion of the *lac* genes to selected promoters in *Escherichia coli* using bacteriophage lambda and Mu. *J. Mol. Biol.* *104*, 541–555.
- Chatterjee, S., Mondal, A.K., Begum, N.A., Roychoudhury, S., and Das, J. (1998). Ordered cloned DNA map of the genome of *Vibrio cholerae* 569B and localization of genetic markers. *J. Bacteriol.* *180*, 901–908.
- Furste, J.P., Pansegrau, W., Frank, R., Blocker, H., Scholz, P., Bagdasarian, M., and Lanka, E. (1986). Molecular cloning of the plasmid RP4 primase region in a multi-host-range *tacP* expression vector. *Gene*. *48*, 119–31.
- Guzman, C.A., Piatti, G., Staendner, L.H., Biavasco, F., and Pruzzo, C. (1995) Export of *Bordetella pertussis* serotype 2 and 3 fimbrial subunits by *Escherichia coli*. *FEMS Microbiol. Lett.* *128*, 189–194.
- Miller, V.L., Taylor, R.K., and Mekalanos, J.J. (1987). Cholera toxin transcriptional activator *toxR* is a transmembrane DNA binding protein. *Cell* *48*, 271–279.
- Taylor, R.K., Miller, V.L., Furlong, D.B., and Mekalanos, J.J. (1987). Use of *phoA* gene fusions to identify a pilus colonization factor co-coordinately regulated with cholera toxin. *Proc. Natl. Acad. Sci. USA* *84*, 2833–2837.
- Thelin, K.H., and Taylor, R.K. (1996). Toxin-coregulated pilus, but not mannose-sensitive hemagglutinin, is required for colonization by *Vibrio cholerae* O1 El Tor biotype and O139 strains. *Infect. Immun.* *64*, 2853–2856.
- Yildiz, F.H., and Schoolnik, G.K. (1998). Role of *rpoS* in stress survival and virulence of *Vibrio cholerae*. *J. Bacteriol.* *180*, 773–784.
